# Supplementary material
Source: publisher figshare collection journal article supplement (https://future-science-group.figshare.com/ndownloader/files/28089555)

**Supplementary Figure 3**. Overall survival and progression-free survival (b), stratified by ECOG PS.

(a)


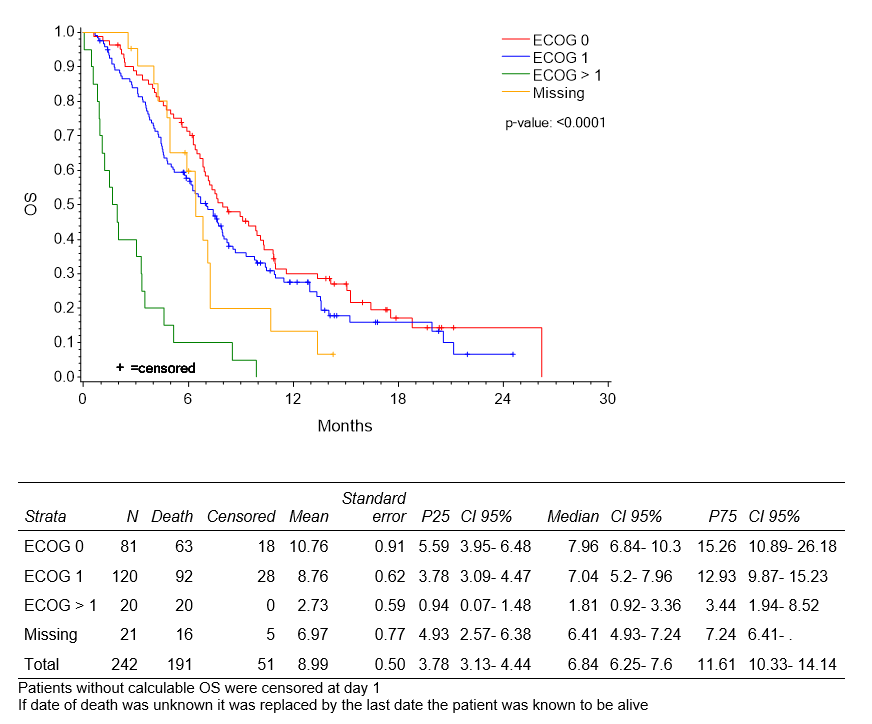


(b)


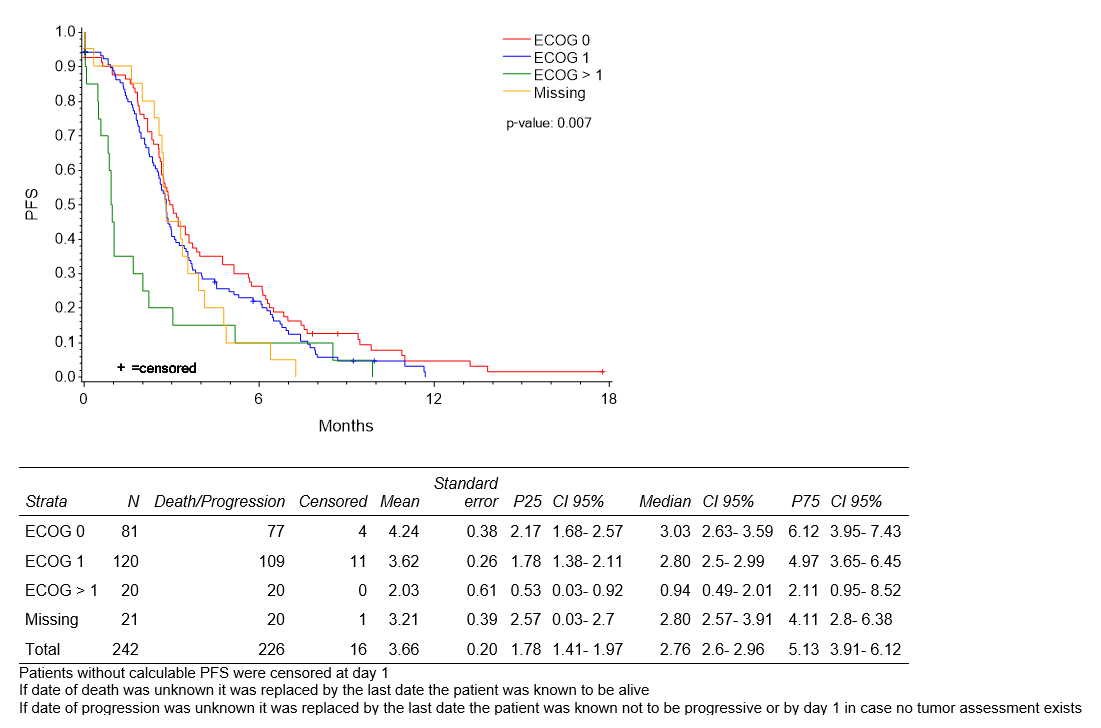

Supplement: Supplementary file 1 [file 28089555]
